1 **Mutation of *kvrA* causes OmpK35/36 porin downregulation and reduced**  
2 **meropenem/vaborbactam susceptibility in KPC-producing *Klebsiella pneumoniae*.**

3

4

5 **Punyawee Dulyayangkul<sup>a</sup>, Wan Ahmad Kamil Wan Nur Ismah<sup>a,b</sup>, Edward J. A.**  
6 **Douglas<sup>a</sup>, Matthew B. Avison<sup>a#</sup>**

7

8

9 **<sup>a</sup>School of Cellular & Molecular Medicine, University of Bristol, Bristol. UK**

10 **<sup>b</sup>Faculty of Biotechnology & Biomolecular Sciences, Universiti Putra Malaysia,**  
11 **Selangor Darul Ehsan, Malaysia.**

12

13

14 **#Correspondence to: School of Cellular & Molecular Medicine, University of Bristol,**  
15 **Bristol, United Kingdom. [bimba@bris.ac.uk](mailto:bimba@bris.ac.uk)**

16

17 **P.D. and W.A.K.W.N.I. contributed equally to this work.**

18

19

20 **Running Title: KvrA loss reduces porin production in *K. pneumoniae***

21 **Abstract**

22 **Meropenem/vaborbactam resistance in *Klebsiella pneumoniae* is associated with loss**  
23 **of function mutations in the OmpK36 porin. Here we identify two previously unknown**  
24 **loss of function mutations that confer cefuroxime resistance in *K. pneumoniae*. The**  
25 **proteins lost were NlpD and KvrA; the latter is a transcriptional repressor that**  
26 **controls capsule production. We demonstrate that KvrA loss reduces OmpK35 and**  
27 **OmpK36 porin production, which confers reduced susceptibility to**  
28 **meropenem/vaborbactam in a KPC-3 producing *K. pneumoniae* clinical isolate.**

29 **Text**

30 Carbapenems are often reserved as a last resort for treatment of severe infections caused  
31 by multi-drug resistant Gram-negative bacteria. A rise in the prevalence of cephalosporin  
32 resistance, particularly due to the spread of mobile cephalosporinase genes in the  
33 Enterobacteriaceae has resulted in the increased use of carbapenems worldwide. This has  
34 driven the emergence of carbapenem resistant Enterobacteriaceae (CRE) which are classed  
35 as one of the greatest threats to human health according to the World Health Organisation.  
36 In *Klebsiella pneumoniae*, carbapenem resistance is mainly mediated by the production of a  
37 carbapenemase. In some parts of the world the most prevalent is the class A  
38 carbapenemase KPC; in others, most common are the class B metallo- $\beta$ -lactamases e.g.  
39 NDM; in others, most class D carbapenemases e.g. OXA-48 like enzymes predominate (1-  
40 3). CRE can also emerge due to mutations that reduce envelope permeability, for example  
41 those that result in porin deficiency, and particularly when these mutations occur in isolates  
42 producing CTX-M or AmpC-type cephalosporinases (4). Indeed, most carbapenem resistant  
43 *K. pneumoniae* clinical isolates have multiple resistance mechanisms, including permeability  
44 defects (5-8).

45 As part of our work aiming to identify novel mechanisms for reduced cephalosporin and/or  
46 carbapenem permeability in *K. pneumoniae*, the *oqxR* and *ramR* double mutant, FQ3,  
47 derived from *K. pneumoniae* Ecl8 as previously described (9) was used as a parent strain to  
48 select cephalosporin resistant mutants. FQ3 overproduces two efflux pumps; AcrAB and  
49 OqxAB, resulting in resistance to fluoroquinolones, chloramphenicol and minocycline (9).  
50 One hundred microlitre aliquots of overnight cultures grown in Nutrient Broth (NB) were  
51 spread onto Mueller Hinton Agar containing  $16 \mu\text{g.mL}^{-1}$  cefuroxime, which were then  
52 incubated for 24 h. One representative mutant derivative was named "FQ3 M1" and was  
53 shown by disc susceptibility testing, performed and interpreted according to CLSI  
54 methodology (10, 11) to be resistant to cefuroxime, cefoxitin and cephalexin (**Table 1**).

55 Changes in envelope protein abundance in mutant FQ3 M1 relative to FQ3 were quantified  
56 using LC-MS/MS proteomics as previously described (9) to identify potential reasons for  
57 cephalosporin resistance. There were 15 proteins significantly altered (**Table 2**). Amongst  
58 this group of proteins with uncertain or metabolic functions, were the important antimicrobial  
59 entry porins OmpK35 and OmpK36, which were both downregulated in FQ3 M1 by almost 3-  
60 fold.

61 We next used WGS to try and explain the downregulation of OmpK35 and OmpK36 in  
62 mutant FQ3 M1 relative to FQ3. WGS was performed by MicrobesNG (Birmingham, UK)  
63 using a HiSeq 2500 instrument (Illumina, San Diego, CA, USA). Reads were trimmed using

64 Trimmomatic (12) and assembled into contigs using SPAdes 3.10.1  
65 (<http://cab.spbu.ru/software/spades/>). Assembled contigs were mapped to the *K.*  
66 *pneumoniae* Ecl8 reference genome (GenBank accession number GCF\_000315385.1) by  
67 using progressive Mauve alignment software (13).

68 No mutations were detected in *ompK36* and *ompK35* or adjacent sequences, or in known  
69 regulators of porin production, e.g. OmpR/EnvZ (14). In fact, FQ3 M1 has three separate  
70 mutations relative to FQ3: a frameshift mutation (causing Asn278FS) in *nlpD*, a frameshift  
71 (causing Asp395FS) in *dhaR*, and a 1,159 bp deletion spanning *kvrA* and the adjacent  
72 genes, *ydhI* and *ydhJ*. In *Escherichia coli*, NlpD is involved in peptidoglycan remodelling  
73 during cell division (15-17). DhaR is a transcriptional activator responsible for controlling the  
74 production of the metabolic enzymes glycerol dehydrogenase and dihydroxyacetone kinase  
75 (18,19). KvrA is a MarR-type transcriptional repressor with a key role in *K. pneumoniae*  
76 capsulation (20-22).

77 In order to deconvolute the possible roles of the three different loss of function mutations, we  
78 separately insertionally inactivated *nlpD*, *dhaR* and *kvrA*, plus *ompK36* as controls in FQ3.  
79 Mutants were constructed using the pKNOCK suicide plasmid (23). DNA fragments of the  
80 genes to be inactivated were amplified with Phusion High-Fidelity DNA Polymerase (NEB,  
81 UK) from *K. pneumoniae* Ecl8 genomic DNA by using primers *ompK36* KO FW (5'-  
82 CGTTCAGGCGAACAACACTG-3') and *ompK36* KO RV (5'-AAGTTCAGGCCGTCAACCAG-  
83 3'); *kvrA* KO FW (5'-ATCTGGCACGTTTAGTTTCGC-3') and *kvrA* KO RV (5'-  
84 CCCTTCTCCTCCAGCTGAT-3'); *dhaR* KO FW (5'-CAATCAGATGTACGGCCTGC-3') and  
85 *dhaR* KO RV (5'-GACTTCGACGTGATTCAGGC-3'); *nlpD* KO FW (5'-  
86 ACGATTTCCGCGACCTGGCG-3') and *nlpD* KO RV (5'-CAACATCTTGGTAGCACTCT-3').  
87 Each PCR product was separately ligated into the pKNOCK-GM at the *Sma*I site and each  
88 recombinant plasmid was then transferred into FQ3 cells by conjugation from *E. coli*  
89 BW20767. Mutants were selected using gentamicin (5 µg.mL<sup>-1</sup>) and the mutations were  
90 confirmed by PCR using primers *ompK36* full length FW (5'-GAGGCATCCGGTTGAAATAG-  
91 3') and *ompK36* full length RV (5'-ATTAATCGAGGCTCCTCTTAC-3'); *kvrA* full length FW  
92 (5'-ACTTAGCAAGCTAATTATAAGGAGATGA-3') and *kvrA* full length RV (5'-  
93 GCCGCAAAGAATTAATCTTTA-3'); *dhaR* full length FW (5'-CAGCCCGATGGACGAGATT-  
94 3') and *dhaR* full length RV (5'-TATTGGGCTCAGCGCGTCC-3'); *nlpD* full length FW (5'-  
95 GTCGGCGAAGAGCATCAGT-3') and *nlpD* full length RV (5'-CACCTTCCACGGCACATCA-  
96 3').

97 Inactivating *dhaR* in FQ3 had no effect on cephalosporin MIC, determined using CLSI  
98 methodology (24) but inactivating *nlpD* or *kvrA*, raised cefoxitin and cefuroxime MIC, though

99 in both cases the MIC was one doubling lower than against FQ3 M1 (**Table 3**). We next  
100 complemented *kvrA* in FQ3 M1. To do this, *kvrA* DNA was amplified from *K. pneumoniae*  
101 Ecl8 genomic DNA by using primers (introduced restriction sites underlined): *kvrA* full length  
102 *Bam*HI FW (5'-AAAGGATCCCGGCAATCCGGATGTGTTAAGAC-3') and *kvrA* full length  
103 *Sall* RV (5'-AAAGTCGACGGAGGGTGAAAAAGGCCCGGATTA-3'). The PCR product was  
104 digested and inserted to pUBYT (25) cut with *Bam*HI and *Sall* to generate pUBYT::*kvrA*. The  
105 recombinant plasmid was then transferred into FQ3 M1 cells by electroporation. The  
106 transformants were selected using kanamycin (50 µg.mL<sup>-1</sup>) and the presence of plasmids  
107 was confirmed by PCR using primers pUBYT check FW (5'-  
108 GCAAGAAGGTGATGAATCTACA-3') and pUBYT check RV (5'-  
109 GTGGCAGCAGCCAACTCA-3'). Complementation of FQ3 M1 with pUBYT::*kvrA* showed  
110 that the MICs of cefoxitin and cefuroxime reduced, but again not to a value as low as against  
111 FQ3. This confirmed the result of the gene inactivation experiment that *kvrA* loss alone is not  
112 the sole determinant of the cephalosporin resistant phenotype expressed by FQ3 M1 (**Table**  
113 **3**).

114 Given that inactivation of either *kvrA* or *nlpD* in FQ3 reduced cephalosporin susceptibility, we  
115 performed LC-MS/MS envelope proteomics for these mutants versus FQ3 as above, which  
116 revealed that mutation in *kvrA* caused a reduction in OmpF (OmpK35) and OmpC (OmpK36)  
117 porin levels in FQ3, to the same extent as seen in FQ3 M1. Mutation in *nlpD*, despite altering  
118 cephalosporin MIC, did not (**Fig. 1 A, B**). Because FQ3 is derived from Ecl8, a laboratory  
119 strain, and because FQ3 carries mutations that increase efflux pump production (9), we  
120 wanted to test the impact of *kvrA* inactivation in a wild-type clinical isolate. To do this, we  
121 insertionally inactivated *kvrA* (as above) in the susceptible *K. pneumoniae* clinical isolate  
122 S17, which has wild-type envelope permeability (26) and showed by LC-MS/MS that OmpF  
123 and OmpC levels fell in this mutant relative to S17, as seen in FQ3. Porin abundance did not  
124 change upon *nlpD* inactivation in S17, also as seen in FQ3 (**Fig. 1 C, D**).

125 β-Lactamase inhibitors such as clavulanic acid, tazobactam and sulbactam have been  
126 successful in overcoming resistance to penicillin derivatives, e.g. amoxicillin, piperacillin and  
127 ticarcillin in Enterobacteriaceae. However, inhibitor/penicillin combinations are not clinically  
128 useful against KPC, CTX-M, OXA-48-like or AmpC producing Enterobacteriaceae isolates,  
129 or those producing metallo-β-lactamases (27). This has led to the development of new β-  
130 lactam/β-lactamase inhibitor combinations, and one recently licenced for clinical use is  
131 meropenem/vaborbactam (28). Vaborbactam is a serine β-lactamases inhibitor based on a  
132 cyclic boronic acid pharmacophore. It has potent in vitro activity against class A β-  
133 lactamases, particularly KPC, and it can restore the activity of meropenem against KPC-  
134 producing Enterobacteriaceae (29-31).

135 Meropenem/vaborbactam resistance in KPC-producing *K. pneumoniae* has been shown to  
136 occur by loss of function mutation in *ompK36*, which encodes is the primary porin for  
137 meropenem entry (32,33). We therefore wanted to test the impact of OmpK36 porin  
138 reduction seen following inactivation of *kvrA* in *K. pneumoniae* S17 (**Fig. 1C**) on  
139 meropenem/vaborbactam susceptibility when the mutant produces KPC. To investigate this,  
140 we used pUBYT::*bla*<sub>KPC-3</sub> (25) to transform *K. pneumoniae* S17, S17Δ*kvrA* and  
141 S17Δ*ompK36* (as a control). As expected, due to carriage of KPC, all transformants were  
142 resistant to meropenem. Addition of 8 μg.mL<sup>-1</sup> vaborbactam (8 μg.mL<sup>-1</sup>) reduced the  
143 meropenem MIC against S17 well into the susceptible range. In contrast,  
144 meropenem/vaborbactam MICs against the *kvrA* and *ompK36* mutants were 1 μg.mL<sup>-1</sup> (four  
145 doublings higher than against S17) and 32 μg.mL<sup>-1</sup> respectively (**Table 4**). Hence, even in an  
146 otherwise wild-type KPC-producing clinical *K. pneumoniae* isolate (26), OmpK35/OmpK36  
147 downregulation caused solely by *kvrA* mutation is enough to reduce  
148 meropenem/varborbactam susceptibility.

149 In conclusion, we report here two loss of function mutations in genes previously not known to  
150 affect antimicrobial susceptibility in *K. pneumoniae*. NlpD (“new lipoprotein D”) is conserved  
151 across Gram-negative bacteria, with essential roles in virulence, e.g. in *Yersinia pestis* (34).  
152 In *E. coli* it is recruited to the division site where it targets the activity of the peptidoglycan  
153 amidase AmiC, to which it binds. Loss of NlpD in *E. coli* is known to delay the onset of cell  
154 lysis after treatment with ampicillin because peptidoglycan breakdown by AmiC is less  
155 targeted to the division site (35,36). This provides a clear rationale for why disruption of *nlpD*  
156 reduces β-lactam susceptibility in *K. pneumoniae* (**Table 1**), but its role as a mediator of  
157 cefuroxime resistance has not previously been suspected.

158 We also report that inactivation of *kvrA* causes cefuroxime resistance in *K. pneumoniae*, but  
159 more importantly, it causes reduced susceptibility meropenem/vaborbactam, even in an  
160 otherwise wild-type *K. pneumoniae* clinical isolate, transformed to express *bla*<sub>KPC-3</sub> from its  
161 native promoter in a low copy number vector (25). We show that cefuroxime resistance and  
162 reduced meropenem/vaborbactam susceptibility in a *kvrA* mutant is associated with  
163 OmpK35/OmpK36 downregulation. This is reminiscent of OmpR mutations in *E. coli*, which  
164 reduce OmpC/OmpF production and can also affect antimicrobial susceptibility (37).

165 KvrA is a MarR-family transcriptional repressor. Importantly, we found that YdhJ is  
166 upregulated 45-fold ( $p=0.002$ ,  $n=3$ ) and >100-fold ( $p<0.0001$ ,  $n=3$ ) according to proteomics  
167 following disruption of *kvrA* in *K. pneumoniae* S17 and FQ3, respectively. YdhJ is encoded  
168 within a putative efflux pump operon adjacent to *kvrA* on the chromosome. Expression of the  
169 homologue of this *ydhJK* operon in *E. coli* is directly repressed by SlyA (38), which is

170 encoded upstream of *ydhIJK*, in an almost identical arrangement as *kvrA* and *ydhIJK* in *K.*  
171 *pneumoniae*. Therefore, the *ydhIJK* operon is likely to be the direct repressive target of KvrA  
172 in this species, with its wider activatory effects being indirect. Similar characterised MarR-  
173 family repressors such as SlyA also tend to have local direct repressive effects, but cause  
174 activation of gene expression at some promoters indirectly by blocking the repressive activity  
175 of H-NS at those promoters (39). Since H-NS is known to have a repressive effect on porin  
176 production in *E. coli* (40) it may well be that increased repressive activity of H-NS in the  
177 absence of KvrA is the explanation for OmpK35/OmpK36 downregulation seen in *K.*  
178 *pneumoniae*.

179 Disruption of *kvrA* also causes downregulation of key capsule biosynthesis genes, e.g. *galF*,  
180 *manC* and *wzi* in some *K. pneumoniae* strains (20). We found using proteomics that Wzi was  
181 downregulated a marginal 0.82-fold ( $p=0.03$ ,  $n=3$ ) upon disruption of *kvrA* in isolate S17 but  
182 not the GalF or ManC and none of these proteins were downregulated in FQ3Δ*kvrA* versus  
183 FQ3. However, it is known that *kvrA* loss does not reduce capsule production in all strains,  
184 and nor does it attenuate the virulence of all strains in a mouse infection model (20). Among  
185 455 isolates of *K. pneumoniae* from NCBI database, we found 9 isolates (Genbank  
186 accession numbers CP037927, LR134162, CP032175, CP018056, CP003200, LR588409,  
187 CP044039, CP043670, CP043669) where *kvrA* was mutated in a way predicted to result in a  
188 truncated and presumably non-functional KvrA. One key example is the KPC-2 and CTX-M-  
189 14 producing carbapenem resistant human sputum isolate HS11286 (41, 42). This confirms  
190 that *kvrA* mutants are present in human clinical samples.

191

## 192 **Acknowledgments**

193 This work was funded by grant MR/S004769/1 to M.B.A. from the Antimicrobial Resistance  
194 Cross Council Initiative supported by the seven United Kingdom research councils and the  
195 National Institute for Health Research. Genome sequencing was provided by MicrobesNG  
196 (<http://www.microbesng.uk/>), which is supported by the BBSRC (grant number  
197 BB/L024209/1). W.A.K.W.N.I. was funded by a postgraduate scholarship from the Malaysian  
198 Ministry of Education. We are grateful to Dr Kate Heesom, School of Biochemistry,  
199 University of Bristol for performing the proteomics analysis and Melissa Rose Bennett,  
200 School of Cellular & Molecular Medicine, University of Bristol for assistance in selecting FQ3  
201 M1.

202

203 **We declare no conflicts of interest.**

204 **Figure Legends**

205 **Figure 1. Normalised abundance of OmpK35 and OmpK36 porins in *K. pneumoniae***  
206 ***kvrA* and *nlpD* mutants.**

207 OmpC (OmpK36) and OmpF (OmpK35) abundance was measured using LC-MS/MS and  
208 normalised to the abundance of OmpA, to control for protein loading. Data presents mean  $\pm$   
209 standard error of the mean,  $n=3$ . Asterisk (\*) indicates statistically significant differences  
210 from the parental strains by t-test ( $p<0.05$ ). **(A)** OmpC to OmpA protein ratio and **(B)** OmpF  
211 to OmpA protein ratio in FQ3 and its mutant derivatives. **(C)** OmpC to OmpA protein ratio  
212 and **(D)** OmpF to OmpA protein ratio in clinical isolate S17 and its mutant derivatives.



213 **Tables**

214

215 **Table 1: Inhibition zone diameters (mm) for antimicrobials against *K. pneumoniae* FQ3**  
 216 **and cefuroxime resistant mutant FQ3 M1.**

| Antimicrobial   | Parental strain, FQ3 | FQ3 M1 |
|-----------------|----------------------|--------|
| Meropenem       | 29                   | 26     |
| Ertapenem       | 28                   | 23     |
| Imipenem        | 28                   | 25     |
| Doripenem       | 27                   | 26     |
| Aztreonam       | 32                   | 31     |
| Cefepime        | 30                   | 26     |
| Ceftazidime     | 28                   | 26     |
| Cefotaxime      | 28                   | 25     |
| Ceftriaxone     | 30                   | 27     |
| Ceftizoxime     | 33                   | 30     |
| Cefoperazone    | 28                   | 24     |
| Cefotetan       | 25                   | 21     |
| Cefoxitin       | 19                   | 10     |
| Cefuroxime      | 19                   | 13     |
| Cephalexin      | 18                   | 10     |
| Ciprofloxacin   | 11                   | 11     |
| Norfloxacin     | 8                    | 6      |
| Ofloxacin       | 8                    | 6      |
| Levofloxacin    | 11                   | 9      |
| Chloramphenicol | 8                    | 6      |
| Minocycline     | 13                   | 12     |
| Amikacin        | 26                   | 25     |
| Gentamicin      | 25                   | 23     |

217

218 Values reported are the means of three repetitions rounded to the nearest integer for the  
 219 diameter of the growth inhibition zone across each antimicrobial disc (mm). Shading  
 220 indicates resistance according to susceptibility breakpoints set by the CLSI (11).

221 **Table 2: Significant changes in envelope protein abundance seen in *K. pneumoniae* mutant FQ3 M1 vs parent strain FQ3**

| Accession | Description                                                   | Abundance FQ3 (1) | Abundance FQ3 (2) | Abundance FQ3 (3) | Abundance FQ3 M1 (1) | Abundance FQ3 M1 (2) | Abundance FQ3 M1 (3) | T-test  | Fold change |
|-----------|---------------------------------------------------------------|-------------------|-------------------|-------------------|----------------------|----------------------|----------------------|---------|-------------|
| A6T518    | Phosphoheptose isomerase, GmhA                                | -                 | -                 | -                 | 1.18E+08             | 2.05E+07             | 2.02E+07             | <0.0005 | >20         |
| A6T720    | Aspartate aminotransferase, AspC                              | -                 | -                 | -                 | 2.11E+07             | 1.92E+07             | 2.27E+07             | <0.0005 | >20         |
| A6TBN4    | ATP-binding component of methyl-galactoside transporter, MglA | -                 | -                 | -                 | 2.64E+07             | 2.11E+07             | 3.40E+07             | <0.0005 | >20         |
| A6TF45    | sn-glycerol-3-phosphate dehydrogenase, GlpD                   | 3.10E+07          | 1.21E+07          | 3.24E+07          | 2.37E+08             | 1.24E+09             | 1.72E+09             | 0.004   | 42.43       |
| A6T5Q5    | Putative outer membrane protein                               | 4.62E+08          | 3.06E+08          | 4.48E+08          | 1.61E+09             | 1.85E+09             | 1.51E+09             | <0.0005 | 4.09        |
| A6TBM3    | Putative channel/filament proteins, YohG                      | 2.93E+08          | 2.57E+08          | 4.77E+08          | 9.04E+08             | 1.04E+09             | 1.31E+09             | <0.0005 | 3.16        |
| A6T4Y7    | Acetyl-coenzyme A carboxylase carboxyl transferase, AccA      | 1.24E+08          | 8.31E+08          | 4.06E+08          | 1.15E+09             | 7.38E+08             | 9.36E+08             | 0.005   | 2.07        |
| A6T8N5    | Putative uncharacterized protein, YdgH                        | 6.65E+08          | 5.22E+08          | 8.53E+08          | 3.69E+08             | 3.61E+08             | 3.44E+08             | 0.001   | 0.53        |
| A6T721    | OmpF porin (OmpK35)                                           | 1.19E+10          | 7.32E+09          | 7.82E+09          | 2.89E+09             | 3.97E+09             | 3.01E+09             | 0.001   | 0.36        |
| A6TBT2    | OmpC porin (OmpK36)                                           | 3.49E+10          | 3.13E+10          | 3.41E+10          | 1.12E+10             | 1.31E+10             | 1.00E+10             | <0.0005 | 0.34        |
| A6TD34    | Lipoprotein, NlpD                                             | 9.15E+08          | 7.51E+08          | 1.14E+09          | 2.64E+08             | 1.68E+08             | 3.13E+08             | <0.0005 | 0.27        |
| A6T4Y4    | Lipid-A-disaccharide synthase, LpxB                           | 6.06E+07          | 5.19E+07          | 1.02E+08          | -                    | -                    | -                    | <0.0005 | <0.005      |
| A6T9Z3    | Putative multidrug resistance protein, YdhJ                   | 7.23E+07          | 6.50E+07          | 9.18E+07          | -                    | -                    | -                    | <0.0005 | <0.005      |
| A6TBM5    | Putative cellobiose-specific PTS permease                     | 2.83E+07          | 1.66E+07          | 3.57E+07          | -                    | -                    | -                    | <0.0005 | <0.005      |
| A6TEA5    | Putative glycerol dehydrogenase, DhaD                         | 5.00E+07          | 2.28E+08          | 2.51E+08          | -                    | -                    | -                    | <0.0005 | <0.005      |

222 Strains were grown in nutrient broth and raw abundance data are provided for three biological replicates of parent (FQ3) and mutant (FQ3 M1).

223 Analysis was as described in (9) and proteins listed are those with significantly different abundance in FQ3 M1 versus FQ3.

224 **Table 3 MICs ( $\mu\text{g.mL}^{-1}$ ) of cephalosporins against *K. pneumoniae* Ecl8 FQ3 and mutant**  
225 **derivatives.**

|                              | <b>Cefuroxime MIC</b> | <b>Cefoxitin MIC</b> |
|------------------------------|-----------------------|----------------------|
| FQ3                          | 8                     | 8                    |
| FQ3 $\Delta dhaR$            | 8                     | 8                    |
| FQ3 $\Delta ompK35$          | 8                     | 8                    |
| FQ3 $\Delta kvrA$            | 16                    | 32                   |
| FQ3 $\Delta nlpD$            | 32                    | 32                   |
| FQ3 $\Delta ompK36$          | 32                    | 32                   |
| FQ3 M1                       | 64                    | 64                   |
| FQ3 M1(pUBYT)                | 32                    | 64                   |
| FQ3 M1(pUBYT:: <i>kvrA</i> ) | 16                    | 16                   |

226

227 The CLSI susceptible and resistance breakpoints (11) for cefuroxime and cefoxitin are  $\leq 8$   
228 and  $\geq 32 \mu\text{g.mL}^{-1}$ .

229 **Table 4 MICs ( $\mu\text{g.mL}^{-1}$ ) of meropenem against *K. pneumoniae* clinical isolate S17 and**  
230 **mutant derivatives measured with and without 8  $\mu\text{g.mL}^{-1}$  of vaborbactam.**

231

|                             | <b>Meropenem MIC</b> | <b>Meropenem/Vaborbactam MIC</b> |
|-----------------------------|----------------------|----------------------------------|
| S17/pKPC-3                  | 128                  | 0.0625/8                         |
| S17 $\Delta ompK36$ /pKPC-3 | >256                 | 32/8                             |
| S17 $\Delta kvrA$ /pKPC-3   | 256                  | 1/8                              |

232

233 The CLSI susceptible and resistance breakpoints (11) for meropenem are  $\leq 1$  and  $\geq 4$   $\mu\text{g.mL}^{-1}$   
234 in the absence and  $\leq 4$  and  $\geq 16$   $\mu\text{g.mL}^{-1}$  in the presence of 8  $\mu\text{g.mL}^{-1}$  vaborbactam.

235 **Figure 1**

236 **A**

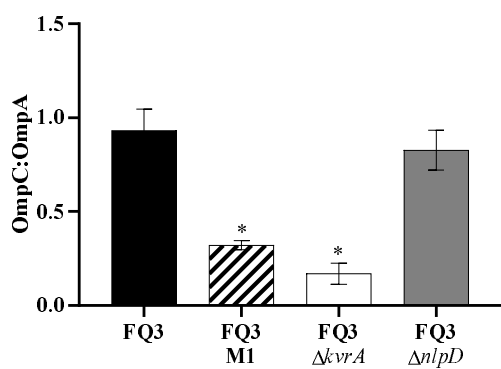

**B**

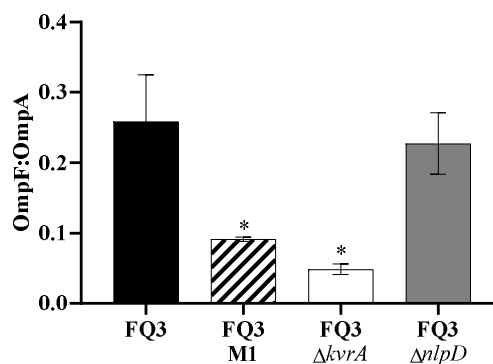

237

238

239

240 **C**

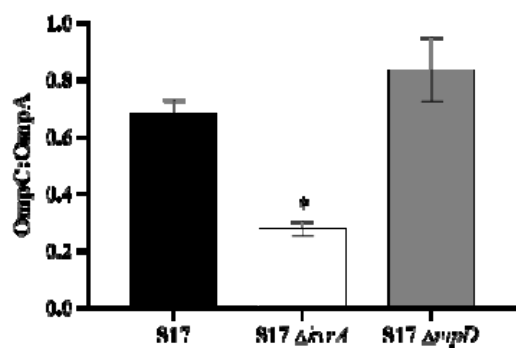

**D**

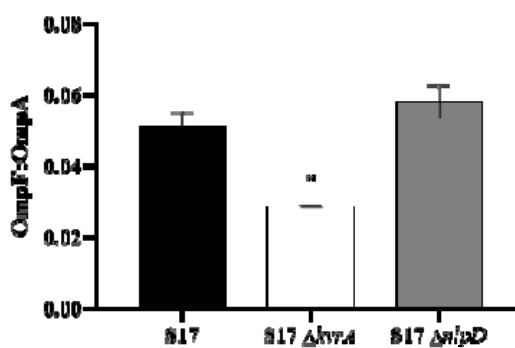

241

## 242 References

- 243 1. Grundmann H, Glasner C, Albiger B, Aanensen DM, Tomlinson CT, Andrasević AT,  
244 Cantón R, Carmeli Y, Friedrich AW, Giske CG, Glupczynski Y, Gniadkowski M,  
245 Livermore DM, Nordmann P, Poirel L, Rossolini GM, Seifert H, Vatopoulos A, Walsh T,  
246 Woodford N, Monnet DL. 2017. Occurrence of carbapenemase-producing *Klebsiella*  
247 *pneumoniae* and *Escherichia coli* in the European survey of carbapenemase-producing  
248 Enterobacteriaceae (EuSCAPE): a prospective, multinational study. *Lancet Infect Dis*  
249 17:153–163.
- 250 2. Walsh TR. 2010. Emerging carbapenemases: a global perspective. *Int J Antimicrob*  
251 *Agents* 36:S8–14.
- 252 3. Queenan AM, Bush K. Carbapenemases: the versatile  $\beta$ -lactamases. 2007. *Clin*  
253 *Microbiol Rev* 20:440–458.
- 254 4. Lee C-H, Chu C, Liu J-W, Chen Y-S, Chiu C-J, Su L-H. 2007. Collateral damage of  
255 flomoxef therapy: in vivo development of porin deficiency and acquisition of *bla*<sub>DHA-1</sub>  
256 leading to ertapenem resistance in a clinical isolate of *Klebsiella pneumoniae* producing  
257 CTX-M-3 and SHV-5  $\beta$ -lactamases. *J Antimicrob Chemother* 60:410–413.
- 258 5. Nordmann P, Dortet L, Poirel L. 2012. Carbapenem resistance in Enterobacteriaceae:  
259 here is the storm! *Trends Mol Med* 18:263–272.
- 260 6. Pitout JDD, Nordmann P, Poirel L. 2015. Carbapenemase-Producing *Klebsiella*  
261 *pneumoniae*, a Key Pathogen Set for Global Nosocomial Dominance. *Antimicrob Agents*  
262 *Chemother* 59:5873–5884.
- 263 7. Papp-Wallace KM, Endimiani A, Taracila MA, Bonomo RA. 2011. Carbapenems: past,  
264 present, and future. *Antimicrob Agents Chemother* 55:4943–4960.
- 265 8. Yan J, Pu S, Jia X, Xu X, Yang S, Shi J, Sun S, Zhang L. 2017. Multidrug Resistance  
266 Mechanisms of Carbapenem Resistant *Klebsiella pneumoniae* Strains Isolated in  
267 Chongqing, China. *Ann Lab Med* 37:398–407.
- 268 9. Wan Nur Ismah WAK, Takebayashi Y, Findlay J, Heesom KJ, Avison MB. 2018. Impact  
269 of OqxR loss of function on the envelope proteome of *Klebsiella pneumoniae* and  
270 susceptibility to antimicrobials. *J Antimicrob Chemother* 73:2990-2996.
- 271 10. Clinical and Laboratory Standards Institute. 2006. M2-A9. Performance standards for  
272 antimicrobial disc susceptibility tests; approved standard, 9th ed. Clinical and Laboratory  
273 Standards Institute, Wayne, PA.
- 274 11. Clinical and Laboratory Standards Institute. 2019. M100-S29. Performance standards for  
275 antimicrobial susceptibility testing; twenty-ninth informational supplement. An  
276 informational supplement for global application developed through the Clinical and  
277 Laboratory Standards Institute consensus process. Clinical and Laboratory Standards

- 278 Institute, Wayne, PA.
- 279 12. Bolger AM, Lohse M, Usadel B. 2014. Trimmomatic: a flexible trimmer for Illumina  
280 sequence data. *Bioinformatics* 30:2114–2120.
- 281 13. Darling AE, Mau B, Perna NT, Batzoglou S, Zhong Y. 2010. progressiveMauve: multiple  
282 genome alignment with gene gain, loss and rearrangement. *PLoS One* 5:e111147.
- 283 14. Cai SJ, Inouye M. 2002. EnvZ-OmpR interaction and osmoregulation in *Escherichia coli*.  
284 *J Biol Chem* 277:24155–24161.
- 285 15. Lange R, Hengge-Aronis R. 1994. The *nlpD* gene is located in an operon with *rpoS* on  
286 the *Escherichia coli* chromosome and encodes a novel lipoprotein with a potential  
287 function in cell wall formation. *Mol Microbiol* 13:733–743.
- 288 16. Ichikawa JK, Li C, Fu J, Clarke S. 1994. A gene at 59 minutes on the *Escherichia coli*  
289 chromosome encodes a lipoprotein with unusual amino acid repeat sequences. *J*  
290 *Bacteriol* 176:1630–1638.
- 291 17. Tsang M-J, Yakhnina AA, Bernhardt TG. 2017. NlpD links cell wall remodeling and outer  
292 membrane invagination during cytokinesis in *Escherichia coli*. *PLOS Genet*  
293 13:e1006888.
- 294 18. Martins-Pinheiro M, Lima WC, Asif H, Oller CA, Menck CFM. 2016. Evolutionary and  
295 Functional Relationships of the *dha* Regulon by Genomic Context Analysis. *PLoS One*  
296 11:e0150772.
- 297 19. Zheng P, Wereath K, Sun J, van den Heuvel J, Zeng A-P. 2006. Overexpression of  
298 genes of the *dha* regulon and its effects on cell growth, glycerol fermentation to 1,3-  
299 propanediol and plasmid stability in *Klebsiella pneumoniae*. *Process Biochem* 41:2160–  
300 2169.
- 301 20. Palacios M, Miner TA, Frederick DR, Sepulveda VE, Quinn JD, Walker KA, Miller VL.  
302 2018. Identification of Two Regulators of Virulence That Are Conserved in *Klebsiella*  
303 *pneumoniae* Classical and Hypervirulent Strains. *MBio* 9. pii:e01443-18.
- 304 21. Dorman MJ, Feltwell T, Goulding DA, Parkhill J, Short FL. 2018. The Capsule Regulatory  
305 Network of *Klebsiella pneumoniae* Defined by density-TraDISort. *MBio*. 9. pii:e01863-18.
- 306 22. Walker KA, Miner TA, Palacios M, Trzilova D, Frederick DR, Broberg CA, Sepúlveda VE,  
307 Quinn JD, Miller VL. 2019. A *Klebsiella pneumoniae* Regulatory Mutant Has Reduced  
308 Capsule Expression but Retains Hypermucoviscosity. *MBio* 10. pii:e00089-19.
- 309 23. Alexeyev MF. 1999. The pKNOCK series of broad-host-range mobilizable suicide  
310 vectors for gene knockout and targeted DNA insertion into the chromosome of gram-  
311 negative bacteria. *BioTechniques* 26:824-828.
- 312 24. Clinical and Laboratory Standards Institute. 2015. M07-A10. Methods for dilution  
313 antimicrobial susceptibility tests for bacteria that grow aerobically; approved standard,  
314 10th ed. Clinical and Laboratory Standards Institute, Wayne, PA.

- 315 25. Takebayashi Y, Wan Nur Ismah WHK, Findlay J, Heesom KJ, Zhang J, Williams OM,  
316 MacGowan AP, Avison MB. 2017. Prediction of cephalosporin and carbapenem  
317 susceptibility in multi-drug resistant Gram-negative bacteria using liquid chromatography-  
318 tandem mass spectrometry. *BioRxiv* 138594; doi: <https://doi.org/10.1101/138594>.
- 319 26. Wan Nur Ismah WAK, Takebayashi Y, Findlay J, Heesom KJ, Jiménez-Castellanos JC,  
320 Zhang J, Graham L, Bowker K, Williams OM, MacGowan AP, Avison MB. 2018.  
321 Prediction of Fluoroquinolone Susceptibility Directly from Whole-Genome Sequence  
322 Data by Using Liquid Chromatography-Tandem Mass Spectrometry To Identify Mutant  
323 Genotypes. *Antimicrob Agents Chemother* 62 pii:e01814-17.
- 324 27. Drawz SM, Bonomo RA. 2010. Three decades of  $\beta$ -lactamase inhibitors. *Clin Microbiol*  
325 *Rev* 23:160–201.
- 326 28. Hecker SJ, Reddy KR, Totrov M, Hirst GC, Lomovskaya O, Griffith DC, King P,  
327 Tsivkovski R, Sun D, Sabet M, Tarazi Z, Clifton MC, Atkins K, Raymond A, Potts KT,  
328 Abendroth J, Boyer SH, Loutit JS, Morgan EE, Durso S, Dudley MN. 2015. Discovery of  
329 a Cyclic Boronic Acid  $\beta$ -Lactamase Inhibitor (RPX7009) with Utility vs Class A Serine  
330 Carbapenemases. *J Med Chem* 8: 3682–3692.
- 331 29. Zhanel GG, Lawrence CK, Adam H, Schweizer F, Zelenitsky S, Zhanel M, Lagacé-Wiens  
332 PRS, Walkty A, Denisuik A, Golden A, Gin AS, Hoban DJ, Lynch JP, Karlowsky JA.  
333 2018. Imipenem–Relebactam and Meropenem–Vaborbactam: Two Novel Carbapenem-  
334  $\beta$ -Lactamase Inhibitor Combinations. *Drugs* 78:65–98.
- 335 30. Hackel MA, Lomovskaya O, Dudley MN, Karlowsky JA, Sahm DF. 2018. In Vitro Activity  
336 of Meropenem-Vaborbactam against Clinical Isolates of KPC-Positive  
337 Enterobacteriaceae. *Antimicrob Agents Chemother* 62:e01904-17.
- 338 31. Christina S, Jorgensen J, Rybak MJ. 2018. Meropenem and Vaborbactam: Stepping up  
339 the Battle against Carbapenem-resistant Enterobacteriaceae. *Pharmacotherapy* 38:444–  
340 461.
- 341 32. Lomovskaya O, Sun D, Rubio-Aparicio D, Nelson K, Tsivkovski R, Griffith DC, Dudley  
342 MN. 2017. Vaborbactam: Spectrum of  $\beta$ -Lactamase Inhibition and Impact of Resistance  
343 Mechanisms on Activity in Enterobacteriaceae. *Antimicrob Agents Chemother*  
344 61:e01443-17.
- 345 33. Findlay J, Hamouda A, Dancer SJJ, Amyes SGB. 2012. Rapid acquisition of decreased  
346 carbapenem susceptibility in a strain of *Klebsiella pneumoniae* arising during  
347 meropenem therapy. *Clin Microbiol Infect* 18:140–146.
- 348 34. Tidhar A, Flashner Y, Cohen S, Levi Y, Zauberman A, Gur D, Aftalion M, Elhanany E, Zvi  
349 A, Shafferman A, Mamroud E. 2009. The NlpD lipoprotein is a novel *Yersinia pestis*  
350 virulence factor essential for the development of plague. *PLoS One*. 4:e7023.
- 351 35. Uehara T, Dinh T, Bernhardt TG. 2009. LytM-domain factors are required for daughter



- 352 cell separation and rapid ampicillin-induced lysis in *Escherichia coli*. J Bacteriol.  
353 191:5094-5107.
- 354 36. Uehara T, Parzych KR, Dinh T, Bernhardt TG. 2010. Daughter cell separation is  
355 controlled by cytokinetic ring-activated cell wall hydrolysis. EMBO J. 29:1412-1422.
- 356 37. Dupont H, Choinier P, Roche D, Adiba S, Sookdeb M, Branger C, Denamur E, Mammeri  
357 H. 2017. Structural Alteration of OmpR as a Source of Ertapenem Resistance in a CTX-  
358 M-15-Producing *Escherichia coli* O25b:H4 Sequence Type 131 Clinical Isolate.  
359 Antimicrob Agents Chemother. 61. pii:e00014-17.
- 360 38. Curran TD, Abacha F, Hibberd SP, Rolfe MD, Lacey MM, Green J. 2017. Identification of  
361 new members of the *Escherichia coli* K-12 MG1655 SlyA regulon. Microbiology 163:400-  
362 409.
- 363 39. Colgan AM, Kröger C, Diard M, Hardt WD, Puente JL, Sivasankaran SK, Hokamp K,  
364 Hinton JC. 2016. The Impact of 18 Ancestral and Horizontally-Acquired Regulatory  
365 Proteins upon the Transcriptome and sRNA Landscape of *Salmonella enterica* serovar  
366 Typhimurium. PLoS Genet. 12:e1006258.
- 367 40. De la Cruz MA, Calva E. 2010. The complexities of porin genetic regulation. J Mol  
368 Microbiol Biotechnol 18:24-36.
- 369 41. Liu P, Li P, Jiang X, Bi D, Xie Y, Tai C, Deng Z, Rajakumar K, Ou HY. 2012. Complete  
370 genome sequence of *Klebsiella pneumoniae* subsp. *pneumoniae* HS11286, a multidrug-  
371 resistant strain isolated from human sputum. J Bacteriol 194:1841-1842.
- 372 42. Bi D, Jiang X, Sheng ZK, Ngmenterebo D, Tai C, Wang M, Deng Z, Rajakumar K, Ou  
373 HY. 2015. Mapping the resistance-associated mobilome of a carbapenem-resistant  
374 *Klebsiella pneumoniae* strain reveals insights into factors shaping these regions and  
375 facilitates generation of a 'resistance-disarmed' model organism. J Antimicrob  
376 Chemother. 70:2770-2774.
